# Supplementary material for: Oncogenic functions and clinical significances of DCLK1 isoforms in colorectal cancer: a systematic review and meta-analysis
Source: Springer Nature journal article supplement (doi:10.1186/s12935-022-02632-9), 2022-06-18
Supplement: MOESM1 [file 23179860]

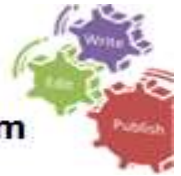

## EDITORIAL CERTIFICATE LETTER

---

This document is to certify that the manuscript listed below was edited for proper English language, grammar, punctuation, spelling, and overall style by one of the highly qualified subject-expert native English speaking editors at **NativeEnglishEdit.com**

The substantive content of the article mentioned below remains the full responsibility of the author/authors:

TITLE OF ARTICLE:

ONCOGENIC FUNCTIONS AND CLINICAL SIGNIFICANCES OF DCLK1 ISOFORMS IN COLORECTAL CANCER: A SYSTEMATIC REVIEW AND META-ANALYSIS

AUTHOR(S):

ELHAM KALANTARI, MAHDIEH RAZMI, FATEMEH TAJIK, MOHSEN ASADI-LARI, ROYA GHODS, ZAHRA MADJD

REFER CODE:

EE-2022-77776703-KALANTARI-5291-MED

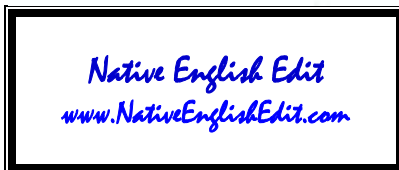

---

Documents receiving this certification should be English-ready for publication; however, the author has the ability to accept or reject our suggestions and changes.

This certificate may be verified at:

[www.NativeEnglishEdit.com](http://www.NativeEnglishEdit.com)

London

East End Road 27, N 3 3QT

United Kingdom
